# Supplementary material
Source: PubMed Central journal article supplement (PMC2786558)
Supplement: supp_191_23_7234__2.pdf [file supp_191_23_7234__2.pdf]

```

ACTINO1 1 : SGITIA--MRRPDPQLVYV--RAFEELAGYRSEEL--LGRNCRFLOCAD-----TDHDAIGRL--RSAI--AEGREVR--ETLLNRYR--GDRSEW--EIYMAPVT--EDRLVQYICVQNV--: 105
ACTINO1 2 : LSFTIS--PTKPNPLVWV--PAFERVTGYR--EVA--LGRNCRFLOCPG-----TDREAVARI--RRAI--ETGDTVT--ELLNRYR--KGTAF--EVVISPVH--DADRLTDFVCSQSDV--: 103
ACTINO1 3 : QAVCIS--VSLPDPVWV--DAFTLTGYLVA--LGRNCRFLOGLSE-----RGHDTTRPAARI--RALR--ERRSGT--VVIENR--RDSVFL--ELSLSPVT--EPD--SVRYVAVSDV--: 109
ACTINO2 : GGIVIT--PNLPDPPIYV--PAFERITGYSRREV--VGRNCRFLORED-----RQAELEVL--QAM--AERRDCR--VVLNRYR--RDRMF--ELYVSPVY--EDERLVNFIQVQNI--: 104
ACTINO3 : ALDTPV--GSLITDAGQNVWANKAFESVGTWSTAE--LGRNCRFLOCPG-----SDPETIAM--TVL--GRGETFR--CEILNRYR--KNGTF--GLTVSPLR--DAAVITDFVSVQSDV--: 107
ALPHA1 : VALTIV--MSLSEQPLVW--PPFLRMGTGTEGRI--LGRNCRFLOREG-----ENPQARADI--EVAL--SKGQETQ--VVLNRYR--FGERF--LLFLHPVG--CSIHPDFLFSQFEL--: 104
ALPHA10 : MPMLIT--PHLPDPPIVFN--PAFLKLTGYEADEV--MGRNCRFLOCHG-----TDPAHVRAI--KSAI--AAEKPID--IDIINRYR--KSGEAF--RLHISPVH--NANERLQFVSSQLDV--: 104
ALPHA11 : MPMLIT--PHLPDPPIVFN--PAFLKLTGYEADEV--MGRNCRFLOCHG-----TDPAHVRAI--KSAI--AAEKPID--IDIINRYR--KSGEAF--RLHISPVH--NANERLQFVSSQLDV--: 104
ALPHA12 : MPMLIT--PHLPDPPIVFN--PAFLKLTGYEADEV--MGRNCRFLOCHG-----TDPAHVRAI--KSAI--AAEKPID--IDIINRYR--KSGEAF--RLHISPVH--NANERLQFVSSQLDV--: 104
ALPHA13 : MAMIVAD--ATQDPDPIIFAN--DAFLRLTGYARDEV--IGRNCRFLOCPD-----TDPKAIQAV--DAL--AAGEDVA--VDLLNRYR--KDGSPF--ALNMSVPR--DAGOLVFFFSQVSDV--: 104
ALPHA14 1 : LPMIVT--ARQSDNPIVFN--DAFLALTGYDLDEV--IGRNCRFLOCLE-----TDPDQVDR--QAV--AQGEVA--LELLNRYR--KDGSTF--ALYLSVPR--CET--EVLFFFTLRI--: 104
ALPHA14 2 : MPMVIA--ARHGDHPIVFN--QAFLLDTGYGAEV--VGRNCRFLOCPG-----TSDAAIAKI--AAV--AQOBCD--VEILNRYR--KDGSDF--QLHLSPVH--EAEQLLIFASQSDV--: 104
ALPHA15 1 : MPMVVV--PHRDDCPIVFN--QAFLEMTGYTREEV--IGRNCRFLOCPD-----TDPARMVA--EAI--AQRRDIA--IEILNRYR--KDGASF--ALFVSPVY--NAA--DLVFLFSQDI--: 104
ALPHA15 2 : MAMITD--PNRLDPPIVFN--DAFLRLTGYTRLEV--IGRNCRFLOCPD-----TDLDAVARI--AAI--ASERDVT--VEILNRYR--KDGSTF--AVYISPVH--ED--TLLFFFSQSDV--: 104
ALPHA16 : IAAVIS--PHLPDPPIVECN--DAFAALTGYRDEI--IGRNCRFLOCPD-----TEPELSAEL--RAI--RDRAAL--VEILNRYR--KDGTRF--AVLVAPLF--CPD--ELEMFLFSQMEV--: 104
ALPHA17 1 : IAALIC--PSTADTPVIECN--SAFLALTGYRREV--IGRNCRFMRGAC-----TEPELTGQI--AAI--SDRRPIL--VEILNRYR--KGGAPF--AVLIAPIF--DSD--TLKFLSLME--: 103
ALPHA17 2 : MPMLIT--PRQDNPPIVFN--KAFLLDTGYEESIE--VGRNCRFLOCAD-----TDRAVSDL--EAV--KHREAS--LEILNRYR--RGTAF--AVFIAPVF--DDE--ELMFFFSQSDV--: 104
ALPHA18 : MPMLIT--PRQDNPPIVFN--RAFLEMTGYELNEI--VGRNCRFLOCPD-----TDQETIAA--SAI--ASRRDIA--VEILNRYR--KNGAAF--ALFVSPVY--NRA--ELMFFFSQSDV--: 104
ALPHA19 : MPMVVV--GRKPLPIVFN--KAFLELTGYPAQEV--LGRNCRFLOCPA-----TSPITAVAI--AAI--AGEREVS--VEILNRYR--KSGEQF--RLHLSPVH--GDD--KILMFFFSQSDV--: 104
ALPHA20 : VALTIV--MSLSEQPLVW--PPFLRMGTGTEGRI--LGRNCRFLOREG-----ENPQARADI--EVAL--SKGQETQ--VVLNRYR--FGERF--LLFLHPVG--CSIHPDFLFSQFEL--: 104
ALPHA21 1 : KVPAVV--DAAMDSPITII--PAFSKMTGYSAE--IGRNCRFLOPAS-----GAGPAKRI--RAF--ADBARAQGVIANER--KDGSRFL--LLLTKLIT--HPD--APLIISQFPI--: 106
ALPHA22 : VAMVLT--PNLDDNPIVFN--EAFVRTGYWASAI--VGRNCRFLOCPD-----TDKAAVDVL--HAI--ELDONVT--VDILNRYR--ANGAPF--RLVVSPIV--DSE--KTEFFI--IQKEL--: 104
ALPHA23 : SGVALASAI--EDAPLIVW--KAFCDMGTSEDEV--VGRNCRFLOCPD-----TDSARQPL--HDFV--HMGGDSGRFPILNRYR--KDGSAF--YVMSRLK--DGT--QOPIIASQDM--: 107
ALPHA24 : SGIALSLSTGGD--VPLALV--DGFTKLTGYAPEV--VGRNCRFLOCEE-----TSAQKQAL--HDFV--HDLSDSGSRFPVSNRYR--KDGSLR--FVLMTRLR--DSE--QTRFIFASQDM--: 107
ALPHA25 : LPLCITD--PTLDPPIVFN--EAFSDLTGYLDEI--VGRNCRFLOGPE-----TRESVDTV--EIL--VDRRVT--VEILNRYR--KDGSRF--ALQSLGPIY--EAL--NLMFFFSQDI--: 104
ALPHA26 : SRVALA--AAPDGNHDLW--GPFSLTGYSSAE--IGRNCRFLOCPD-----DNEAGKAI--EAF--QNHQDQASVRTPI--KDGKVP--VLLSRLQ--CAD--TTKIFASQSDV--: 107
ALPHA27 : MAVCLT--PHQDDPIVFN--EAFQLTGYRREDI--LGRNCRFLOCPD-----TDQRIAKI--RAI--AEEVSV--VEILNRYR--KDGSTF--VLLHIGPIY--EAE--RLTFFFSQSDV--: 104
ALPHA28 : FSMVLAS--ATLEDPILYIN--ERFTAVTGYSAEMT--VGRNCRFLOCPD-----TDPRSVAKI--QAL--EDGEDIT--VDLANYR--ADGKTF--RLLISPIR--NDV--DIVSFL--IQRL--: 104
ALPHA29 : MPMLIT--PRQDNPPIVFN--RAFLEMTGYLTEI--VGRNCRFLOCPD-----TDRDTIDAV--TAI--ANRODIA--VEILNRYR--KNGAAF--ALFVSPVY--NRN--DLVFFFSQSDV--: 104
ALPHA2 1 : VAMVLT--PNINDNPIVFN--DAFERVTGYSRTAA--IGRNCRFLOGSM-----TDDADVAKL--RAI--EREEDVT--VDILNRYR--ASGEPF--RLI--IAPY--SDD--KCHFIFIQKAM--: 104
ALPHA2 2 : ADATDTA--RPLIYV--SAFERLSGYAAEVE--LGRNCRFLOGSAEP-----PDSABERRL--AAV--QANGSQ--FLRLNRYR--KSGDLF--ELTLFPVE--NEA--EVVLMVATQTV--: 99
ALPHA2 3 : MSVVFS--PSQDNPPIVFN--DAFLVGTGYLEEV--LGRNCRFLOCPD-----TDPHERVARI--EVAL--KAETRT--IDIINRYR--KDGSAF--VRLRIRPIY--DPE--NLMFFFAQSDV--: 104
ALPHA3 : LALVLT--PHLDDNPIYAN--RAFETITGYSAGAI--IGRNCRFLOCPD-----TDPHVVRI--SEAL--RNEEDVT--VEILNRYR--ADGKTF--KLMITPLY--DDH--NLQCFV--VQSDM--: 104
ALPHA30 1 : MPMVIT--ARKSDPIVFN--KAFLELTGYEADEV--LGRNCRFLOCPA-----TSPITAAAI--AAI--AGEREVS--IEILNRYR--KSGEQF--RLHLSPVH--GDD--ERLFFFSQDI--: 104
ALPHA30 2 : MPMLIT--PAQHDNPIIFCN--AAPEKMTGYSNDEL--IGRNCRFLOGPE-----TDRRSYGYI--RDSV--ARQODIS--VDILNRYR--KDGSTF--ALFVSPVY--DDE--RILFFFSQDF--: 104
ALPHA31 : --MVVIT--ARKPLPIVFN--KSFLLDTGYAADEV--VGRNCRFLOCPA-----TSPITAVAI--ASV--AERDVS--VEILNRYR--KSGEPF--RLHLSPVH--GDD--RILFFFSQDI--: 102
ALPHA32 : MPMLIT--PHLPDPPIVFN--PAFLKLTGYEADEV--MGRNCRFLOCHG-----TDPAHVRAI--KSAI--AAEKPID--IDIINRYR--KSGEAF--RLHISPVH--NANERLQFVSSQLDV--: 104
ALPHA33 : MPMLIT--PHLPDPPIVFN--PAFLKLTGYEADEV--MGRNCRFLOCHG-----TDPAHVRAI--KSAI--AAEKPID--IDIINRYR--KSGEAF--RLHISPVH--NANERLQFVSSQLDV--: 104
ALPHA34 : MPMLIT--PHLPDPPIVFN--PAFLKLTGYEADEV--MGRNCRFLOCHG-----TDPAHVRAI--KSAI--AAEKPID--IDIINRYR--KSGEAF--RLHISPVH--NANERLQFVSSQLDV--: 104
ALPHA35 : MPMLIT--PHLPDPPIVFN--PAFLKLTGYEADEV--MGRNCRFLOCHG-----TDPAHVCAI--KSAI--AAEKPID--IDIINRYR--KSGEAF--RLHISPVH--NANERLQFVSSQLDV--: 104
ALPHA36 1 : QPMFTD--PRLDPPIVFN--PAFQALTGYGEADL--VGRNCRFLOCPG-----TDPQTVARI--RAV--AEGREAR--VAILNRYR--RGTSTF--ELFVCPVF--EAE--RLNFFFSQDIA--: 104
ALPHA36 2 : MPMLIT--PRQDNPPIIFAN--QAFRLTGYDESEL--IGRNCRFLOGPE-----TDPQTVARI--RAV--AEGREAR--VAILNRYR--RGTSTF--ELFVCPVF--EAE--RLNFFFSQDIA--: 104
ALPHA37 1 : MPMVVV--PNQDDHPVFN--QAFLEMTGYARDEV--IGRNCRFLOCPD-----TDPATRALV--DAV--AARRDVA--TEILNRYR--KDGSSF--ALFVSPVY--NAA--DLLFFFSQDI--: 104
ALPHA37 2 : MAMITD--PRRLDPPIYAN--DAFLRLTGYTRLEV--IGRNCRFLOCPG-----TDPFAVARI--RAI--DAERDVA--EELLNRYR--KDGSTF--ALYISPVH--ED--TLLFFFSQSDV--: 104
ALPHA37 3 : TPMVVV--PRRGDNPVVW--GAFGLTGYAREEL--YGRNCRMLQCPD-----TDAVLQTM--AAL--ATGRPFE--GELLNRYR--KDGTSF--GMTINPVC--EAE--KVLFFFSAQDM--: 104
ALPHA37 4 : MPMLIT--PHQDNPPIIFAN--RAFVRTGYSAEEL--IGRNCRFLOCPD-----TDRDTVSEV--DAI--REHREFA--AEILNRYR--KDGSSF--ALFVSPVY--NRN--DLVFFFSQSDV--: 104
ALPHA37 5 : MPMLIT--PHRPDPPIVFN--GAFSKLTGYSREEL--LGRNCRFLOGPE-----TDPDVARI--DAV--ERRVPE--IDLLNRYR--KSGEVF--RLLISPVF--DDE--QLTFFFSQDF--: 104
ALPHA38 1 : MPMVVV--PNQDDHPVFN--QAFLEMTGYARDEV--IGRNCRFLOCPD-----TDPATRALV--DAV--AARRDVA--TEILNRYR--KDGSSF--ALFVSPVY--NAA--DLLFFFSQDI--: 104
ALPHA38 2 : MAMITD--PRRLDPPIYAN--DAFLRLTGYTRLEV--IGRNCRFLOCPG-----TDPFAVARI--RAI--DAERDVA--EELLNRYR--KDGSTF--ALYISPVH--ED--TLLFFFSQSDV--: 104
ALPHA38 3 : TPMVVV--PRRGDNPVVW--GAFGLTGYAREEL--YGRNCRMLQCPD-----TDAVLQTM--AAL--ATGRPFE--GELLNRYR--KDGTSF--GMTINPVC--EAE--KVLFFFSAQDM--: 104
ALPHA38 4 : MPMVIT--PRLDPPIVFN--DSFCRLTGYREEL--VGRNCRFLOCPD-----TDPADVTCL--QEI--AAPRSIE--IDILNRYR--KDGTSF--RLLMAPVK--DAR--ALAFFFSQSDV--: 104
ALPHA38 5 : MPMLIT--PHQDNPPIIFAN--RAFVRTGYSAEEL--IGRNCRFLOCPD-----TDRDTVSEV--DAI--REHREFA--AEILNRYR--KDGSSF--ALFVSPVY--NRN--DLVFFFSQSDV--: 104
ALPHA38 6 : MPMLIT--PHRPDPPIVFN--GAFSKLTGYSREEL--LGRNCRFLOGPE-----TDPDVARI--DAV--ERRVPE--IDLLNRYR--KSGEVF--RLLISPVF--DDE--QLTFFFSQDF--: 104
ALPHA39 1 : MPMLIT--PYGDPPIIFV--HAFTKLTGYSREEL--LGRNCRFLOGPE-----TDPDVGRI--DAI--ERRVPE--IDLLNRYR--KSGEVF--RLLISPVH--DDE--RLTFFFSQSDV--: 104
ALPHA39 2 : MPMVVV--PNQDDHPVFN--QAFLEMTGYADEV--IGRNCRFLOCPD-----TDPATRAVQ--RAI--EQRDIA--TEILNRYR--KDGSSF--ALFVSPVY--NAA--DLVFFFSQDI--: 104
ALPHA39 3 : MPMVIT--PRRPDPPIVFN--DAFCRLTGYAREEL--IGRNCRFLOCPD-----TDPVTRLI--RAI--VAPRSIE--IDIRNRYR--KDGTFP--RLLAPVN--DAG--DLAFFFSQSDV--: 104
ALPHA39 4 : MPMLIT--PRQDNPPIIFAN--RAFIRMTGYTDEL--IGRNCRFLOCPD-----TDRDTVSDV--DAI--REHREFA--TEILNRYR--KDGSSF--ALFVSPVY--NRN--DLVFFFSQSDV--: 104
ALPHA39 5 : MAMITD--PRRLDPPIYAN--DAFLRLTGYTRLEV--IGRNCRFLOCPD-----TDLDTVARI--RAI--RSQDVS--AEILNRYR--KDGSTF--ALFVSPVH--ED--TLLFFFSQSDV--: 104
ALPHA39 6 : TPMVVV--PRRGDNPVVW--GAFGLTGYAREEL--YGRNCRMLQCPD-----TDEAVLQRM--EVAL--AAGRPE--GELLNRYR--KDGTFP--GMTINPVC--EAE--EVVFFFSAQDM--: 104
ALPHA39 7 : AHIALAAGVGD--NPLLVN--EPFYKLTGYAAPEV--IGRNCRFLOCPD-----ENPAREKI--HAF--EGDAVNAVRTTILNRYR--KDGQPF--VLLYMSKLV--ALS--EVRFLFASQSDV--: 107
ALPHA39 8 : LPMILT--PNQDDPIVFN--DAFLDLTGYGVDEV--VGRNCRFLOCPD-----TEHHDVEI--EAL--RDNRTIT--IEILNRYR--RGTTFP--ALFVSPVY--DDE--ERLRFASQSDV--: 104
ALPHA40 1 : SHIALA--AAGD--NVLLV--ERFHELTYGAEV--VGRNCRLODA-----DNREARAKI--HAF--ENDRQDTRTPILNRYR--KDGKPF--VLLYMSKLV--ALS--EVRFLFASQSDV--: 107
ALPHA40 2 : --MVVIT--ARAPDPIAVN--DAFLTATGYAADEI--VGRNCRMLQCPA-----TDRSTVORI--SAV--EAAEPS--VEILNRYR--KDGSSF--AMTITPVY--EAE--LAFYAAQDM--: 101
ALPHA40 3 : MPMLIT--PRQDNPPIIFAN--RAFLLAMTGYTPEEL--IGRNCRFLOCPD-----TDRDVAQV--RAI--AEKREFA--TEILNRYR--KDGSTF--ALFVSPVY--NRN--DLVFFFSQSDV--: 104
ALPHA40 4 : MPMLIT--PAQHDNPIVFN--DAFLKLTGYTRMEV--VGRNCRFLOCPD-----TEAAAVDLR--RAI--RREEDIR--VDLLNRYR--KDGSTF--ALYVGPVY--EAE--RVVFFFSQSDV--: 104
ALPHA40 5 : MPMLIT--PHQDNPPIVFN--NAFLDLTGYEESIE--LGRNCRFLOGSAEP-----NKADIARI--RAI--ARFVIE--IEILNRYR--KSGEVF--RLLISPVH--RD--ELTFFFSQSDV--: 104
ALPHA40 6 : MAMIVT--PNLPDPPIVFN--RAFLELSGTAEEL--IGRNCRFLOCPA-----TDPADIARV--RAI--AARDVV--VELLNRYR--RGTSTF--ELYISPVY--CPH--ELLFFFSQDL--: 104
ALPHA41 1 : VPMLLAE--ARPPGYPVAFAN--EAFCLRTGYAADEI--LGRNCRFLOCPD-----NCGPLAHL--RAAL--SRGEEAR--GEVRLNRYR--KDGMPF--GAAVVSVPVY--VAS--EVIYAFVFT--DV--: 103
ALPHA41 2 : MPMLIT--PRQDNPPIIFAN--NAFLDLTGYEESIE--LGRNCRFLOGSAEP-----TDPHVAKL--EAV--HERKPTA--IEILNRYR--RGTTFP--AVFMVGPVY--DPA--EYVFFFSQSDV--: 104
ALPHA41 3 : QPMILT--PHLPDPPIVFN--AAFQALTGYAEDDL--VGRNCRFLOCPD-----TDPATVARI--RAI--AEGREIR--ASILNRYR--KDGSRF--ELFVCPVF--EAE--RLNFFFSQSDV--: 104
ALPHA42 : MPMLIT--PRLDPPIIFAN--EAFQNTGTYAADEI--IGRNCRFLOGPE-----TDPKHVEI--HSAI--EAQSV--IDILNRYR--KSGEPF--RLHISPVK--TEN--ELHFFFSQSDV--: 104
ALPHA4 1 : MPMIIT--PRQDNPPIIFAN--KAFQDLTGYDRDEI--IGRNCRFLOCPD-----TDPTEVDRL--QAI--ARKEPVN--VQLNRYR--KDGSAF--VSLYVSPVY--ED--DVQFFFSQSDM--: 104

```

ALPHA4 2 : LALVLTN--PNLDDNPIVYVN--RAFEEKITRVSADAV--IGRNCRFLODD-----DDPAQVRQL--AOAV--REERDFS--VDIVNYR--SDCTRFLNRLMITPLY--EERHLQCFLVQORDM : 104
ALPHA5 : VAMVLTN--POLDDNPIVYVN--RAFEBELTGVSHMA--VGRNCRFLOCEK-----TRKADVARL--REAV--ATGEDVS--LEILNYR--ANGEPFTNALLISPILD--SET--EATLFLVQREI : 105
ALPHA6 : VAMVMTN--PNLDDNPIVYVN--EAFVRTTGVSHSAI--VGRNCRFLOCED-----DDKAADVLL--RHAI--ELDONVT--VDILNYR--ANGAPPNRLIIVSPIM--DAQRTBFFIQKEL-- : 104
ALPHA7 1 : IAFVLTN--PGLEDNPIVYVN--RAFENLTGVAAEVS--LGRNCRFLOCPD-----DDKBAVKKM--RHLH--QRAAPVE--TVLLNYR--SDGKPPNRLIIEPIF--DSD--QLSCFLVQORV : 104
ALPHA7 2 : VAMVMTN--PNLDDNPIVYVN--EAFVRTTGVSHSAI--VGRNCRFLOCED-----DDKAADVLL--RHAI--ELDONVT--VDILNYR--ANGAPPNRLIIVSPIM--DAQRTBFFIQKEL-- : 104
ALPHA8 1 : IASVVVS--PRLADNPLIATN--QAFTDITGVSEEC--VGRNCRFLASG-----TEPWLTDKI--RGCV--REHKPVL--VEILNYR--KDGTPFNRAVLVAPIY--DDDELLVFLVSOVEV : 104
ALPHA8 2 : FSLTIAD--ISQDDEPLIYVN--RAFEQMTGVSRSSV--VGRNCRFLOCEK-----DDPGAVERL--AKAI--RNCEEVE--ETIYNYR--ADGEGFNHLLMGPLE--DDEKCRVFCVQVDM : 104
ALPHA8 3 : MAVCLTD--PHQDHPVIFCN--AAFERLTGVSEKDI--LGRNCRFLOCAR-----DDSEQVARI--RDAL--AKEEVAV--VELLNYR--KDGSTFNALHLGPIY--DESKLKMFFRSQWNV : 104
ALPHA8 4 : LAICISD--PHQDHPVIFCN--QAFLDLTGVAREEI--VGRNCRFLOCAD-----DDPQOVRKL--REGI--AAERYTV--VDLLNYR--KDGIPFNRAVHVGPYI--CED--TLQVFFYSQWNI : 104
ALPHA9 1 : MAICLCD--PHEKDLPIVYVN--RAFRRHLTGVDEBIV--VGRNCRFLOCPG-----DDPAAVARI--KAAL--EREDVIV--VELLNYR--KDGTAFNALHLGSPVY--AD--CLOVFFYSQWNI : 104
ALPHA9 2 : TAAVISN--PRLADNPIIACN--DAFVELTGVAREEI--LGRNCRFLRSG-----TEDDKARIL--DGI--WRKQPV--VEIVNYR--KDGTRFNRAVMVAPIF--AD--EVEVFLVSOVEI : 104
ARCH1 1 : VGVIITD--PNQDHPVIFCN--DHYRELTGVSLPEL--LGRNCRFLOCEK-----DDPEFVDAL--DAI--DAGEQVS--VELRNYR--KDGTEFNRYRIVAPVR--DD--TVVNYVCFQOBT : 104
ARCH1 2 : VGVIITD--PKQDTPISYVN--ROFLELTGVTESEV--RGRNCRFLOCEE-----TEAEPVDAM--RAAI--DADEPVS--VELRNYR--KDGTMFNQVSIAPVR--DND--TVVNYVCFQOBT : 104
ARCH2 2 : VGSIAD--ARKDLPPIYVN--NRFVETITGVARAEE--LGRNCRFLOCEA-----TRDEPIAQL--RAAI--ERGETAT--VELRNYR--KDGTMFNRVTVSPLK--MHN--EVTNYVCFQOBT : 104
ARCH3 1 : VGITISD--PALSNDPMVYVN--DRFVEMTGVDRDDA--VGRNCRFLOCED-----DDERPVARL--RAAI--DAEPEES--VELLNYR--KDGTPFNRVSVAPIR--AGD--SVSEWVCFQOBT : 104
ARCH3 2 : VGITISD--PALSNDPMVYVN--DRFVEMTGVDRDDA--VGRNCRFLOCED-----DDERPVARL--RAAI--DAEPEES--VELLNYR--KDGTPFNRVSVAPIR--AGD--SVSEWVCFQOBT : 104
BETA1 : MPMVVD--PHLPDHPVIFCN--HAFLRMTGVLETFE--IGSNCRFLOCEP-----DDRATIDEV--RAAV--ADRRELA--TEILNYR--KDGSTFNALFISPVF--NEQ--ELVFFVCFQOBT : 104
BETA10 : NAILITA--PSPAGNLIBYVN--PAFMRITGVDPAEV--LGRNCRFLODD-----REOQVALI--REAL--AANREVS--AVVRNYR--KDGALFNQLFIAPVP--DAE--IITHI--VIVNV : 104
BETA11 1 : DGLIIA--ARAPDHPVIFCN--PAFEQLSGWLEBI--LGRNCRFLOCTD-----QAQRNISTL--ANSL--EKGKHSI--VTLRNYR--KDGSLFNELSIAPV--DQS--AVLTHI--IQOBT : 104
BETA11 2 : NPVIVD--TATPMPPIYVN--GAFETITGVSEEA--LGRNCRFLOCMD-----DDQPLGKL--RAAI--REGRPAS--VLLRNYR--KDGSMFNELYIAPVS--DTSG--AVLTHI--VIVNV : 105
BETA2 : MPMLVTD--PRQDHPVIFCN--RAFVAMTGVQODI--LGRNCRFLOCPA-----DDRNTVAAL--RAAI--DQRREIS--LELLNYR--KDGSTFNALFISPVY--NAR--ELVFFVCFQOBT : 104
BETA3 : NGVTLAD--PDMDLPLIYVN--KAFADMVGTQEBE--LGRNCRFLOCTD-----REOBERSQI--RAI--TNKEPIE--VTLRNYR--KNGELFNHLKIIPLF--D--SO--KVLTHI--VIVNV : 104
BETA4 1 : SGISVAD--ALQDLPPIYVN--PGFERMTGVAREEV--LGRNCRFLHSE-----PQOPALNEV--RVAL--RDASEIR--VLLRNYR--KDGHPFNINFLSPVR--D--SR--AVTNYVCFQOBT : 104
BETA4 2 : SGITVAD--AQDLPPIYVN--PGFERMTGVAREEV--LGRNCRFLHSE-----PQOPALNEV--RAAL--RDASEIR--VLLRNYR--KDGHPFNINFLSPVR--D--SO--AVTNYVCFQOBT : 104
BETA5 : LPMVVA--ATQDLPPIYVN--TAFERLSTGLPDQV--LGRNCRFLOAGD-----DDQPLTRL--REAL--AAERACS--VTLRNYR--ADGTSFINELHVPVR--D--TL--ERVTVVCFQOBT : 104
BETA6 : NGITIGD--ASDGEFPIYVN--PAFYRMTGVEPQDV--LGRNCRFLOCGL-----TDQPLQTL--RAAI--ANGVEST--VLLRNYR--KDGTFFNELTVSPLV--D--DS--TLTHI--VIVNV : 104
BETA7 : NAILITA--PSPAGNLIBYVN--PAFMRITGVDAEBA--LGRNCRFLODD-----DDQGVALI--RAAI--AANREVS--AVVRNYR--KDGALFNQLFIAPVP--D--Q--VITHI--VIVNV : 104
BETA9 : LPMVVA--ATQDLPPIYVN--TAFERLSTGLPDQV--LGRNCRFLOAGD-----DDQPLTRL--REAL--AAERACS--VTLRNYR--ADGTSFINELHVPVR--D--TL--ERVTVVCFQOBT : 104
CHLORO1 : SGVIVAD--AQDHPVIFCN--RAFCTITGVAREEV--LGRNCRFLOCPG-----DDQAVTRI--CEAI--AAARPVH--ERLLNYR--KDGQPFNQAISPVF--D--Q--ERVTAFI--QOBT : 103
CHLORO2 : SGMIVTD--AGADQPIVYVN--RAFSTITGVAPNEV--LGRNCRFLOCPQ-----DDAATVARL--RAAI--AAARPIQ--ERILNYR--KDGQPFNQLSISPVF--D--ET--ENVVAVVCFQOBT : 103
CHLORO3 : DGVIVD--PHQDHPVYVN--PAFERITGVTPBEI--LGRNCRFLODD-----DDQOGLREL--RAAI--REKRATR--VLLRNYR--KDGSLFNELDINPVF--D--EN--ELNFI--VIVNV : 104
CYANO1 : NGVIVD--YRQDHPVIFCN--PAFERMTGVRAETE--LGRNCRFLOCGD-----RHQDGAFAI--RAAI--KKGQSCR--VLLRNYR--KNGQLFNELAISPIY--D--NEF--EITHI--VIVNV : 104
CYANO10 1 : QGVAIAD--ATHPDLILTYVN--SAFKKLTGVNAABA--LGRNCRFLOCGD-----RAQPGITTL--RAAI--RNGQACE--VLLRNYR--KDGSLFNQLTIAPIT--D--GO--KVS--YVALQRI : 104
CYANO10 2 : NGVIVD--AIQDHPVIFCN--PAFERITGVSEAE--LGRNCRFLOCGE-----RDSIQEBE--HRGL--SQAENVH--VILRNYR--KDGQPFNDLYISPIF--NAQ--ENVTHI--VIVNV : 104
CYANO11 : QGVVITD--AREANPIIYVN--QGFEKITGVTADEI--LGRNCRFLOCRD-----RRQPPLTEL--RAAI--LKGQECN--VTLRNYR--KNGEFPNALHIFPVR--D--PA--VLTTHI--VIVNV : 104
CYANO12 : NSVITD--ATASDYPIIYVN--PGFETMTGVSLBEV--LGRNCRFLOESD-----RQOQLEBI--RHCL--QQQOPCH--VTLRNYR--KDGSLFNEMSLSPIK--D--ES--KII--YVCFQOBT : 104
CYANO13 : NGIITD--ATQDHPVIFCN--PGFERMTGVSLBEV--LGRNCRFLOCGD-----RNQPEILYM--RACL--QEHQRCF--ITRNYR--KDGSMFNELVSLPVK--D--ES--KLMVYVCFQOBT : 104
CYANO14 : DGVIVD--ATVQFPPIYVN--PSFYQFTGVTPDEV--LGRNCRFLOCPK-----DDPNMTVDEI--RQAL--KNDQTFE--GEILNYR--KDGQPFNLLRKLPT--D--NAQ--EVHFLVCFQOBT : 104
CYANO2 1 : NGVILTD--ANQDHPVIFCN--QAFEAMTGVSADEV--LGRNCRFLOANE-----DDQLSSEL--RQAL--QKQECH--VILRNYR--KDGTEFNELYIAPVF--D--SC--QLTTHI--VIVNV : 104
CYANO2 2 : NGVIVD--AKLDPVPIYVN--SAFEQITGVKATEI--VGRNCRFLOCGD-----TDQPAIEEL--RQAL--KAGKCK--VILRNYR--KDGSLFNQLSVSPIY--D--ND--QLS--FI--QOBT : 104
CYANO3 1 : QGVAIAD--ATHPDLILTYVN--SAFKKLTGVNAABA--LGRNCRFLOCGD-----RAQPGITTL--RAAI--RNGQACE--VLLRNYR--KDGSLFNQLTIAPIT--D--GO--KVS--YVALQRI : 104
CYANO3 2 : NGVIVD--AIQDHPVIFCN--PAFERITGVSEAE--LGRNCRFLOCGE-----RDSIQEBE--HRGL--SQAENVH--VILRNYR--KDGQPFNDLYISPIF--NAQ--ENVTHI--VIVNV : 104
CYANO4 1 : NGIITD--PNQDHPVIFCN--PAFELITGVCAEV--LGRNCRFLOCGD-----LEQVALNEL--RAAI--QBQRECH--VILRNYR--KDNFLFNELYIAPVF--D--NS--YLTTHI--VIVNV : 104
CYANO4 2 : NGIITD--ARLPYNPPIYVN--CAFEEKITGVTAADV--LGRNCRFLOCTD-----SQOPALNEL--RSSL--QAGTSCK--VILRNYR--KDGSLFNELCISPIH--D--EN--KLS--FI--QOBT : 104
CYANO5 : NSVITD--ATASDYPIIYVN--PGFETMTGVSLQEV--LGRNCRFLOCGD-----DQOPELEI--RDCL--QKGESCH--VTLRNYR--KDGSLFNEMSLSPIK--D--ES--NII--YVCFQOBT : 104
CYANO6 1 : NGVITD--ATQDHPVIFCN--QAFEEKITGVSADEV--LGRNCRFLOCGD-----RQPNLDI--RVAL--KNDDECL--VIIRNYR--KDGTLFNELVSLPVF--D--AG--NITHI--VIVNV : 104
CYANO6 2 : NGIVIA--AQLTKPLTYVN--SGFERTGVSADEV--LGRNCRFLOCGD-----DDQNLIEI--RNSI--AEGRETK--IIVRNYR--KDGTPFNKLSISPVH--D--EE--NLTTHI--VIVNV : 104
CYANO6 3 : NGIVIA--AQLTKPLTYVN--SGFERTGVSADEV--LGRNCRFLOCGD-----DDQNLIEI--RNSI--AEGRETK--IIVRNYR--KDGTPFNKLSISPVH--D--EE--NLTTHI--VIVNV : 104
CYANO6 4 : NGIVITE--ATQDHPVIFCN--PGFESITGVSRBEV--LGRNCRFLOCGD-----RHQPALKEL--RAAI--KAGESCS--VTLRNYR--KGRFLFNELTISPVF--D--TW--KLTTHI--VIVNV : 104
CYANO6 5 : SGIVIS--AKAKNPIIYVN--PTFERITGVSSDI--LGRNCRFLOCGD-----DDQPAIETI--RNSL--REAKDKL--VTLRNYR--KDGTPFNELAISPVF--D--TT--EVTTHI--VIVNV : 104
CYANO6 6 : NGIITD--PHQDHPVIFCN--TAVEHSTGVPSAEI--LGRNCRFLOCGD-----RNPPEINII--RAAI--SAKKECN--VLLRNYR--KDGSLFNELFISPVF--D--NK--EVTTHI--VIVNV : 104
CYANO8 : NGIITD--ATASDYPIIYVN--PGFVMTGVFFEEV--LGRNCRFLOCGD-----HQPQLEI--RHCL--YHGENCH--ITLNYR--KDGSLFNELSLSPIK--D--ES--KII--YVCFQOBT : 104
CYANO9 : NGIITD--ALGSDNAVYVN--QGFETITGVNREEV--LGRNCRFLNED-----ROGNOQLEKL--RAAI--AHGOECC--VLLRNYR--KDGASFNHLYLSPYI--D--NQ--FLVTHI--VIVNV : 107
CYANO9 1 : NGIVIS--AKLPHYPIYVN--SAFEQITGVKATEV--VGRNCRFLNED-----TQQAIEEL--RQAL--KAGKCK--VILRNYR--KDGSLFNQLSVSPIY--D--ND--QLS--FI--QOBT : 104
CYANO9 2 : NGIVITD--ANQDHPVIFCN--QAFETMTGVSADEV--LGRNCRFLOANE-----DDQPLMEL--RQAL--REKKECH--VILRNYR--KDGTEFNELYIAPVF--D--SC--QLTTHI--VIVNV : 104
DANIO : FVLGNAQ--VQSLYPIVYCS--DGFCELTGVARAELMOKS--LGRNCRFLQPE--TSDRLMAQI--QCAL--DERREFK--TELVYK--KGGTQVCLLDRLV--D--NEK--EVVFLVSHKVI : 105
FIRMI1 : VGVIITD--PEQDHPVIFCN--TGFEKITGVAKEEA--LGRNCRFLOCGD-----DDKEEVAKI--RAAI--NEKSTAN--VLLRNYR--KDGTSFNELTIEPIY--D--DHE--HLVCFQOBT : 103
FIRMI10 : LVFIISD--PDLDPPIIYVN--RGMELTGVSTDEV--LGRNCRFLOCGD-----TSPQVSIL--RAAI--RLMEPVS--VEILNYR--KDGEPFNLLHIDPIY--D--LEEDKY--FVCFQOBT : 104
FIRMI11 : VGVIITD--PEQDHPVIFCN--TGFEKITGVAKEEA--LGRNCRFLOCGD-----DDKKEVAKI--RAAI--NEKSTAN--VLLRNYR--KDGTSFNELTIEPIY--D--DHN--HLVCFQOBT : 103
FIRMI2 : VGVIITD--PEQDHPVIFCN--TGFEKITGVAKEEA--LGRNCRFLOCGD-----DDKKEVAKI--RAAI--NEKSTAN--VLLRNYR--KDGTSFNELTIEPIY--D--DHN--HLVCFQOBT : 103
FIRMI3 : VGVIITD--PEQDHPVIFCN--TGFEKITGVAKEEA--LGRNCRFLOCGD-----DDKKEVAKI--RAAI--NEKSTAN--VLLRNYR--KDGTSFNELTIEPIY--D--DHN--HLVCFQOBT : 103
FIRMI4 : VGVIITD--PALEDNPIYVN--QGFVQMTGVETBEI--LGRNCRFLOCGD-----DDPAEVDNI--RVAL--QNKPEVT--VQIQNYK--KDGTMFNELNIDPL--D--EIE--KTFFVCFQOBT : 102
FIRMI5 : VGIVTD--PSTEDNPIVIAN--KGFLELTGVSEHEI--LGRNCRFLOCGD-----DDNISIKQI--DAI--QNKPEVT--IQIYNYK--KDGTFFNELSIDHMM--D--EIE--KTFFVCFQOBT : 104
FIRMI6 : VGVIITD--PEQDHPVIFCN--TGFEKITGVAKEEA--LGRNCRFLOCGD-----DDKKEVAKI--RAAI--NEKSTAN--VLLRNYR--KDGTSFNELTIEPIY--D--DHE--HLVCFQOBT : 103
FIRMI7 : IGVIITD--PSLEDNPIIYVN--QGFMDTGVSSBEI--LGRNCRFLOCGE-----DDRQOVAKI--RSL--TOKEKIT--VLLRNYR--KDGTPFNELNIDPL--D--VEI--KLVCFQOBT : 102
FIRMI8 : VGVIITD--ABQDHPVIFCN--TGFEKITGVAKEEA--LGRNCRFLOCGD-----DDRQOVAKI--RSL--TOKEKIT--VLLRNYR--KDGTSFNELNIDPL--D--VEI--KLVCFQOBT : 102
FIRMI9 1 : IGVIITD--PSLEDNPIIYVN--HGFTHTGVKPEDI--LGRNCRFLOCGD-----DDQQLDLI--RQAI--QKSTAN--VLLRNYR--KDGTFFNELNIDPL--D--EIE--KTFFVCFQOBT : 104
FIRMI9 2 : VGLTVD--PSLEDNPIIYVN--KGFMDTGVQPEEV--LGRNCRFLOCGE-----TEQIALQOI--RAAI--ENKEAVT--VQLNYK--KSGQMFNELSVAPLWIDENE--D--R--KLVCFQOBT : 106
FUNGI1 1 : CAFVVC--LRETDPIIYVS--DVFENLTGVSRHEV--LGRNCRFLOCPGKIQ--GERRTATENDKVVYL--KAV--DNRTEQ--QAIINR--KGGQPFNLLTMIPI--D--ASD--DPTLSLVGFQV : 115
FUNGI1 2 : LDTKLK--PRADNPIVYAS--DGFVSVTGVSRSDI--LGRNCRFLOCGF-----DDRQATKRL--RSTI--ENCEETV--ELLNYR--KNGDPFNLLYVSPLL--D--GN--DVRFFL--GQI : 102
FUNGI2 1 : DCFCLT--PKRADNPIVYAS--DGFVSVTGVSRSDI--LGRNCRFLOCGF-----DDRQATKRL--RSTI--ENCEETV--ELLNYR--KNGDPFNLLYVSPLL--D--GN--DVRFFL--GQI : 102
FUNGI2 2 : CAFVVC--LRETDPIIYVS--DVFENLTGVSRHEV--LGRNCRFLOCPGKIQ--GERRLDENDKVVYL--KAI--DTRTEQ--QAIINR--KGGQPFNLLTMIPI--D--ASD--DPTLSLVGFQV : 115
FUNGI3 1 : CAFVVS--LRETDPIIYVS--SNFQNLTVSEHEI--LGRNCRFLOAPDQVBEA--GVRKRFVADDAVPSL--KAI--AERKETQ--QSLINR--KGGKPFNLLTMIPI--D--WEB--QLRNYVCFQOBT : 115
FUNGI3 2 : CAMILC--LALDTPVIVAT--NPFLELTGVSSBEV--LGRNCRFLOAPPDNGAVNQGSPROHVSKNLVQDM--RSV--DSNYEQ--LEVPNR--KDGTRFNLLTMIPIR--D--WGD--YRY--SV : 111

FUNGI3 3 : DSFTMTD - PRLADNPIIFAS - DGFASLTGHPLSDI - ISKNCVLOCKO - DDKQAVARI - RAAV - REETEVV - EBLVNYK - KNGDPFWNLLYIAPLF - EEOQLAFFI - GOVNC - 104  
FUNG14 1 : CAFVLC - LTMEDSPIVVS - HAFERLTGNEKEI - VERNORFLOSPDAKVEK - GEPRKFVDSHTVSRL - SAV - DRRSEIQ - VSIINRY - KGGQPFLNLTMTIPVR - WNAKD - YVQFQVLD - 113  
FUNG14 2 : CAFVLC - LTMEDSPIVVS - HAFERLTGNEKEI - VERNORFLOSPDAKVEK - GEPRKFVDSHTVSRL - SAV - DRRSEIQ - VSIINRY - KGGQPFLNLTMTIPVR - WNAKD - YVQFQVLD - 113  
FUNG16 : CAFVVC - VTLNDCPIIYVS - DNFQNLTYGSRHEI - VERNORFLOAPDNVEA - GTRKREVDNNAVYTL - KTI - AEGEQIC - QSLINRY - KGGKPFLLTMTIPV - WDTEBIRNFIHQFQIDL - 115  
FUNG17 : CSFVVVD - IRRYDPIVVS - PNFTRLTYGELPQL - LERNCRFLOSPDGEVTK - GSKREYDNEAVYLL - KRS - EAEGEQIC - TSLINRY - KRSEPFINLVTVPVPI - WDGPDVFIHQFQIDL - 115  
GAMMA1 : MPMTVTD - PHLPDNPVIFAN - RAFLEMTGVADEI - IENNCRFLOEPE - DDPASISDV - ESI - ESRREFA - TEVLNRY - KDGSSFWNLFVSPV - DDKNLVFFFSQQLV - 104  
GAMMA10 : VSIISD - IKRVCPIIYAN - SAFFELTYGTRBEEI - IENNCRFLOEPE - DDKENTIDCI - KAI - ATREPIE - TTVLNRY - KDGTKFFNRLNLTVPK - TNBITIYI - FQOQV - 103  
GAMMA11 : DGIVVAEREGKDNILYVN - PAFERLTGYSRDEI - LYQDCRFLOCGD - DDKENLALI - DAL - RNNGSCR - EILNRY - KDGTPFWNELSITPV - NVDGQTFVQVQV - 105  
GAMMA12 : DGIVVAE - QEGEDNIIYVN - PAFERLTGYSRDEI - LYQDCRFLOCGD - RDQGLREVI - QAL - RQRGPCR - EVLNRY - KDGSHFWNELSITPV - NDSQLTIFI - QVQV - 104  
GAMMA13 1 : DGIVVAE - QEGEDTILYVN - AAFEYLTGYSRDEI - LYQDCRFLOCGD - RDQGLGRARI - KAM - AEGRPCR - EVLNRY - KDGSAFWNELSITPV - SDFQRTIFI - IQKV - 104  
GAMMA13 2 : DGIVVAE - QEGNESILYVN - PAFERLTGYSRDEI - LYQDCRFLOCGD - HDQPGIAT - EAI - REGRPC - QVLNRY - KDGSLFWNELSITPV - NEAQLTIFI - IQRV - 104  
GAMMA14 1 : DGIVVAE - QEGEDTILYVN - AAFECLTGYSRDEI - LYQDCRFLOCGD - RDQGLGRARI - KAM - AEGRPCR - EVLNRY - KDGSAFWNELSITPV - SDFQRTIFI - IQKV - 104  
GAMMA14 2 : DGIVVAE - QEGNESILYVN - PAFERLTGYSRDEI - LYQDCRFLOCGD - HDQPGIAT - EAI - REGRPC - QVLNRY - KDGSLFWNELSITPV - NEAQLTIFI - IQRV - 104  
GAMMA15 1 : DGIVVAE - QEGNESILYVN - PAFERLTGYSRDEI - LYQDCRFLOCGD - HDQALDAI - QAI - RDGRPC - QVLNRY - KDGSLFWNELSITPV - NEAQLTIFI - IQRV - 104  
GAMMA15 2 : DGIVVAE - QEGEDTILYVN - PAFERLTGYSRDEI - LYQDCRFLOCGD - RDQGLARARI - KAL - AEGRPCR - EVLNRY - KDGSAFWNELSITPV - CDAHRTIFI - IQKV - 104  
GAMMA16 : DGIVVAE - QEGEDTILYVN - QGFERLTGYSRDEI - LYQDCRFLOCGD - RDQPOLDEI - RSI - RQGPCR - EVLNRY - KDGSMFWNELSITPV - DDEQLTIFI - QVQV - 104  
GAMMA17 : MPMTVTD - PYLDPNPVIFAN - RAFLEMTGVADEI - IENNCRFLOEPE - DTRQAVADV - EAI - DNRREFA - TEVLNRY - KDGSTFWNALFVSPV - DDTKLVVFFFSQQLV - 104  
GAMMA18 : MPMTVTD - PYLDPNPVIFAN - RAFLEMTGVADEI - IENNCRFLOEPE - DTRQAVADV - EAI - DNRREFA - TEVLNRY - KDGSTFWNALFVSPV - DDTKLVVFFFSQQLV - 104  
GAMMA19 : DGIVVAE - QEGEDNIIYVN - PAFERLTGVADEI - LYQDCRFLOCGD - RDQGLQAI - DAV - KNNKPCR - QILNRY - KDGTPFWNELSITPV - NEAQLTIFI - IQKV - 104  
GAMMA2 : MPMTVTD - PYLDPNPVIFAN - RAFLEMTGVADEI - IENNCRFLOEPE - DTRQAVADV - EAI - DNRREFA - TEVLNRY - KDGSTFWNALFVSPV - DDTKLVVFFFSQQLV - 104  
GAMMA20 1 : LGVTIAE - ARQDPLPIYVN - AAFQITGYSRDEI - LERNCRFLOVAD - HAQLELOPL - SAL - REGRSGH - AVVNRY - KDGSRPFWNEVVLAPM - DER - ISHFVGLQOQV - 103  
GAMMA20 2 : DGIVVAE - QEGEDNIIYVN - AAFERLTGYSRDEI - LYQDCRFLOCGD - RAQGLQAI - DAV - KAKKPCR - QILNRY - KDGSAFWNELSITPV - NESQLTIFI - IQKV - 104  
GAMMA21 : VGVITIAE - INKPEPLIYAN - RFFYKLTGYSRDEI - IENNCRFLOEPE - DTRREARLI - DAI - NTRRKIV - LELNRY - KDGTEFWNEKLFSP - PKDECRAYV - IQOQI - 103  
GAMMA22 : SGEGITI - MDANDIIVDVN - SAFTQITGYSRDEI - IENNCRFLEAER - DTRSDIAQV - AAL - EQTGFQ - GEVDRH - KEGYDFPWLMMSV - DETAISYI - CSTI - 103  
GAMMA23 : SGEGITI - IDANDIIVDVN - TAFSQTGYSRDEI - IENNCRFLEAER - DTKSIDPQV - AAL - EQTGFQ - GEVDRH - KEGYDFPWLMMSV - DESAVSYI - CSTI - 103  
GAMMA24 : SGEGITI - IDANDIIVDVN - TAFSQTGYSRDEI - IENNCRFLEAER - DTKSIDPQV - AAL - EQTGFQ - GEVDRH - KEGYDFPWLMMSV - DESAVSYI - CSTI - 103  
GAMMA25 : SGEGITI - IDANDIIVDVN - TAFSQTGYSRDEI - IENNCRFLEAER - DTKSIDPQV - AAL - EQTGFQ - GEVDRH - KEGYDFPWLMMSV - DESAVSYI - CSTI - 103  
GAMMA26 : SGEGITI - MDANDIIVDVN - TAFSQTGYSRDEI - IENNCRFLEAER - DTKSIDPQV - AAL - EQTGFQ - GEVDRH - KEGYDFPWLMMSV - DESAVSYI - CSTI - 103  
GAMMA27 : SGEGITI - MDANDIIVDVN - TAFSQTGYSRDEI - IENNCRFLEAER - DTKSIDPQV - AAL - EQTGFQ - GEVDRH - KEGYDFPWLMMSV - DESAVSYI - CSTI - 103  
GAMMA28 : SGEGITI - MDANDIIVDVN - TAFSQTGYSRDEI - IENNCRFLEAER - DTKSIDPQV - AAL - EQTGFQ - GEVDRH - KEGYDFPWLMMSV - DESAVSYI - CSTI - 103  
GAMMA29 : SGEGITI - MDANDIIVDVN - TAFSQTGYSRDEI - IENNCRFLEAER - DTKSIDPQV - AAL - EQTGFQ - GEVDRH - KEGYDFPWLMMSV - DESAVSYI - CSTI - 103  
GAMMA3 : MPMTVTD - PHLPDNPVIFAN - RAFLEMTGVADEI - IENNCRFLOEPE - DDPASISDV - ESI - ESRSEFA - TEVLNRY - KDGSSFWNALFVSPV - DDKNLVFFFSQQLV - 104  
GAMMA30 : SGEGITI - MDANDIIVDVN - TAFSQTGYSRDEI - IENNCRFLEAER - DTKSIDPQV - AAL - EQTGFQ - GEVDRH - KEGYDFPWLMMSV - DESAVSYI - CSTI - 103  
GAMMA31 : NGMLMV - ARSPDMPVYAN - PAFTEMGYSRDEI - MGNCRFLOEPE - TALEALETI - RGL - HHTTEVN - VELNRY - KDGTPFWNHLRISPV - ENDELCTIFI - TQOQV - 104  
GAMMA4 : MPMTVTD - PHLPDNPVIFAN - RAFLEMTGVADEI - IENNCRFLOEPE - DDPASISDV - ESI - ESRSEFA - TEVLNRY - KDGSSFWNALFVSPV - DDKNLVFFFSQQLV - 104  
GAMMA5 : MPMTVTD - PNRPDNPVIFAN - RAFLEMTGVADEI - IENNCRFLOEPE - DTRAVQSI - DAI - DQRVDIS - TEVLNRY - KDGSSFWNALFVSPV - NDAELI - FFFASQ - 104  
GAMMA6 : MPMTVTD - PNRPDNPVIFAN - RAFLEMTGVADEI - IENNCRFLOEPE - DTRAVQSI - DAI - DQRVDIS - TEVLNRY - KDGSSFWNALFVSPV - NDAELI - FFFASQ - 104  
GAMMA7 : MPMTVTD - PNRPDNPVIFAN - RAFLEMTGVADEI - IENNCRFLOEPE - DTRAVQSI - DAI - DQRVDIS - TEVLNRY - KDGSSFWNALFVSPV - NDAELI - FFFASQ - 104  
GAMMA8 : NGISLTD - PDQEDNPIIYAN - EAFKILTGSREI - IENNCRFLOEPE - DTRAVQSI - DAI - DQRVDIS - TEVLNRY - KDGSSFWNALFVSPV - NDAELI - FFFASQ - 104  
GAMMA9 : NPIVTD - PNEQDNPVIFAN - NSFCELFYKYE - IENNCRFLOEPE - KEQKLENI - EAI - STQKSE - VKIRDY - KDGKLYEDITISPV - KEKELVYFLGIY - 104  
HUMAN : SNFVLG - AQVAGLFPVVYCS - DGFCDLTGFSRAEVMQR - CACSFLYCPD - TSELVROQI - KAL - DEHKEFK - AELILY - KSGLPFWCLLDVPIK - NEKEVALFLVSHKI - 107  
MANDUCA : SSFLLAQ - IVDYPIYVN - ETFCKMSYRRAEVMQR - CACSFYMGEL - TEKBAERV - DAL - DHHLADQ - FEILLY - KNRTPLVLLVHVAPIR - NERELVLLVFLVTRPI - 106  
MOUSE : SNFVLG - AQVAGLFPVVYCS - DGFCDLTGFSRAEVMQR - CACSFLYCPD - TSELVROQI - KAL - DEHKEFK - AELILY - KSGLPFWCLLDVPIK - NEKEVALFLVSHKI - 107  
PLANT10NL1 : TSFVVVD - ALKPLPIIFAS - TGFFNLTYGTSREI - IENNCRFLOEPE - DTRAVQSI - DAI - DQRVDIS - TEVLNRY - KDGSSFWNALFVSPV - NDAELI - FFFASQ - 104  
PLANT10NL2 : HSFVIT - PRLPDNPVIFAN - DQFLELTGYSRDEI - LERNCRFLOEPE - DDLKAVQLI - DAV - KEGRDT - VQLNRY - KGGKPFNLFHLQAMR - KKNLQIFI - VQOQET - 104  
PLANT11NL1 : TSFVVVD - ALKPLPIIFAS - TGFFNLTYGTSREI - IENNCRFLOEPE - DTRAVQSI - DAI - DQRVDIS - TEVLNRY - KDGSSFWNALFVSPV - NDAELI - FFFASQ - 104  
PLANT11NL2 : QSFVIT - PRLPDNPVIFAN - DQFLELTGYSRDEI - LERNCRFLOEPE - DDLKAVQLI - DAV - KEGRDT - VQLNRY - KGGKPFNLFHLQAMR - KKNLQIFI - VQOQET - 104  
PLANT1 1L1 : QTFVVS - ATKPDPIIYAS - AGFFNMTGYSRDEI - IENNCRFLOEPE - DDPADVEKI - RAV - KNGKPC - GRLLNRY - KDGSTFWNLLTITPIK - ENKVVIFI - QVQV - 104  
PLANT1 1L2 : KNFVIT - PRLPDNPVIFAN - DEFLELTGYSRDEI - LERNCRFLOEPE - DDKQNTVQI - DAI - KENRDT - VQLNRY - KSGKPFNLFHLQAMR - HKELQIFI - VQOQET - 104  
PLANT1 2L1 : QTFVVS - ATKPDPIIYAS - AGFFNMTGYSRDEI - IENNCRFLOEPE - DDPMEVEKI - QAV - RTGKPC - GRLLNRY - KDGSTFWNLLTITPIK - ENKVVIFI - QVQV - 104  
PLANT1 2L2 : KNFVIT - PRLPDNPVIFAN - DEFLELTGYSRDEI - LERNCRFLOEPE - DDKQNTVQI - DAI - KENRDT - VQLNRY - KSGKPFNLFHLQAMR - HKELQIFI - VQOQET - 104  
PLANT1 3L1 : QTFVVS - ATKPDPIIYAS - AGFFNMTGYSRDEI - IENNCRFLOEPE - DDPADVEKI - RAV - KNGKPC - GRLLNRY - KDGSTFWNLLTITPIK - ENKVVIFI - QVQV - 104  
PLANT1 3L2 : KNFVIT - PRLPDNPVIFAN - DEFLELTGYSRDEI - LERNCRFLOEPE - DDLAVVDQI - DAI - AARDIT - VQLNRY - KSGKPFNLFHLQAMR - HDLQIFI - VQOQET - 104  
PLANT2 3 : QGLVVD - ALBPDPIIYAN - RGFEATGYSRDEI - LERNCRFLOEPE - RCL - DNGTEFR - GDLNRY - KDGSPMLNKLHLPYI - CDDTITIFI - QVQV - 113  
PLANT2 4 : QGLVVD - ALBPDPIIYAN - RGFEATGYSRDEI - LERNCRFLOEPE - RCL - DNGTEFR - GDLNRY - KDGSPMLNKLHLPYI - CDDTITIFI - QVQV - 113  
PLANT2L1 : QTFVVS - ATKPDPIIYAS - AGFFNMTGYSRDEI - IENNCRFLOEPE - DDAEVAKI - DAV - KHGRSFC - GRLLNRY - KDGAPFWNLLTITPIY - DDKVIFI - QVQV - 104  
PLANT2L2 : KNFVIT - PRLPDNPVIFAN - DSFLELTGYSRDEI - LERNCRFLOEPE - DDKQNTVQI - DAI - REKQIT - VQLNRY - KSGKPFNLFHLQAMR - KOKELQIFI - VQOQET - 104  
PLANT3L1 : HTFVVD - ATLPDPIIYAN - EGFYAMTGSREI - LERNCRFLOEPE - DDPKEVQI - DAI - KGEACS - VRLNRY - KDGTPFWNLLTITPIK - TPDQVSI - FVQVQV - 104  
PLANT3L2 : QNFCTIS - PTLPDPIIYAN - DAFLELTGYSRDEI - LERNCRFLOEPE - DDRGTVDQI - AAI - KESSELT - VRLNRY - KAGKAFNMLTAPM - QDCHARFV - VQVQV - 104  
PLANT4 1 : PSFVVS - ALBPDPIIYAN - RVFEVFTGYSRDEI - LERNCRFLOEPE - RCL - DEEIEFQ - GELNRY - KDGTPVNRRLRPIR - DDTITIFI - QVQV - 113  
PLANT4 2 : QGFVVS - ALBPDPIIYAN - TVFEIVTGSREI - LERNCRFLOEPE - RCL - ENGIEFQ - GELNRY - KDGSPMLNKLHLPYI - EEDE - ITIFI - VLLFT - 112  
PLANT4 3 : QGFVVD - ALBPDPIIYAN - TVFEMVGSREI - LERNCRFLOEPE - RCL - DEEIEFQ - GELNRY - KDGSPMLNKLHLPYI - DDTITIFI - QVQV - 113  
PLANT4 4 : PSFVVS - ALBPDPIIYAN - RVFEVFTGYSRDEI - LERNCRFLOEPE - RCL - DEEIEFQ - GELNRY - KDGTPVNRRLRPIR - DDTITIFI - QVQV - 113  
PLANT4P1L1 : -TFVVS - ATKPDPIIYAS - AGFFNMTGYSRDEI - IENNCRFLOEPE - DDADELAKI - RETL - AAGNNY - GRILNRY - KDGSTFWNLLTITPIK - DESKVLIFI - QVQV - 102  
PLANT4P1L2 : KNFVIT - PRLPDNPVIFAN - DSFLELTGYSRDEI - LERNCRFLOEPE - DDLTIVTKI - NAI - DNGTEV - VQLNRY - KSGKPFNLFHLQAMR - KOKEVQIFI - VQOQET - 104  
PLANT4P2L1 : -TFVVS - ATKPDPIIYAS - AGFFNMTGYSRDEI - IENNCRFLOEPE - DDKNEVAKI - DCV - KNGKPC - GRLLNRY - KDGTPFWNLLTITPIK - DDKNTIFI - QVQV - 102  
PLANT4P2L2 : KNFVIT - PRLPDNPVIFAN - DSFLELTGYSRDEI - LERNCRFLOEPE - DDKQNTVQI - DAI - RDQREIT - VQLNRY - KSGKPFNLFHLQAMR - KOKELQIFI - VQOQET - 104  
PLANT5 1 : QGFVTD - ALBPDPIIYAN - TVFEMVGSREI - LERNCRFLOEPE - RCL - DNGTEV - GELNRY - KDGSPMLNKLHLPYI - DDTITIFI - QVQV - 113  
PLANT5 2 : SSIVVC - ALBPDPIIYAN - TSFEIFTGYSRDEI - LERNCRFLOEPE - RCL - EBAVQFE - GELNRY - KDGTPVNRRLRPIR - ADDTITIFI - QVQV - 113  
PLANT7AUR1 : QNFVIT - ASLPDNPVIFAN - RGFLTLTGSREI - LERNCRFLOEPE - DDPRAVDKI - NAI - TKGVDT - VCLNRY - QGGTFFWNLLFVAGLR - SKENINNY - VQVQV - 104  
PLANT7AUR2 : PSFCVT - PLVPDPIIYAN - DSFIKLTGYSRDEI - LERNCRFLOEPE - DDPADVIL - RGI - VEGKDT - VTLNRY - AKGEPFNHVFIAALR - SSOVINNY - VQVQV - 104  
PLANT8NL1 : NSFVIT - ALKPLPIIYAS - TGFFNLTYGTSREI - IENNCRFLOEPE - DDPADVASI - EAL - AQGTQPC - GRLLNRY - KDGSSFWNLLTITPIK - DDLKAVQLI - VQOQET - 105  
PLANT8NL2 : KSFVIT - PRLPDNPVIFAN - DEFLELTGYSRDEI - LERNCRFLOEPE - DDKAVQLI - DAV - KEGRDT - VQLNRY - KGGKPFNLFHLQAMR - ENDELQIFI - VQOQET - 104  
PLANT9P1L1 : QTFVVC - ATKPDPIIYAS - EGFYRMTGYSRDEI - IENNCRFLOEPE - DDRSEVEKL - QAL - LDQSWC - GRLLNRY - KDGSSFWNLLTITPIK - DSRVVI - QVQV - 104

```

PLANT9P1L2 : KNFVITD-PRLPDNPIIFAS--DDFLELEETREEI--IGRNCFLOCKD-----TDKETVAKI--RHAI--DNHQDIT--VQLLNVT-KGCKPFWMLFHLQAVR--TKERLQWFIQVQLDA- : 104
PLANT9P2L1 : QTFVISD-ATKPIPIVFAS--EGFYEMTGMGPEEV--IGYNCRFLOCEG-----TSRDEVTRL--KQCL--VEGQPFV--GRLLNYS-KDGTFFWLLTVSPVR--SATQKVVWFIQMQTEV- : 104
PLANT9P2L2 : KNFVITD-PRLPENPIIFAS--DDFLELEETMSREEV--IGRNCRFLOCPD-----TDQDTVQKI--RDAI--RDCRDVT--VQLLNVT-KGCKPFWMLFHLQAVK--NSKEBLQWFIQVQLDA- : 104
          a      g      ac      tgy      g aCa      g      g      g      dcg ggG      ag      g      g      t      g      g

```

**Supplementary Figure 1: Multiple sequence alignment of LOV domain amino acid sequences obtained from the three kingdoms of life.** The sequences were aligned as described in Materials and Methods. A complete sequence list including full taxa names, accession numbers etc. can be found in Supplementary Table 1. In the alignment phototropin LOV sequences were split into LOV1 and LOV2 and included separately in the alignment (indicated by the abbreviations L1 and L2 in the respective sequence ID).
