# Supplementary material
Source: PubMed Central journal article supplement (PMC2786558)
Supplement: supp_191_23_7234__3.pdf [file supp_191_23_7234__3.pdf]

**A**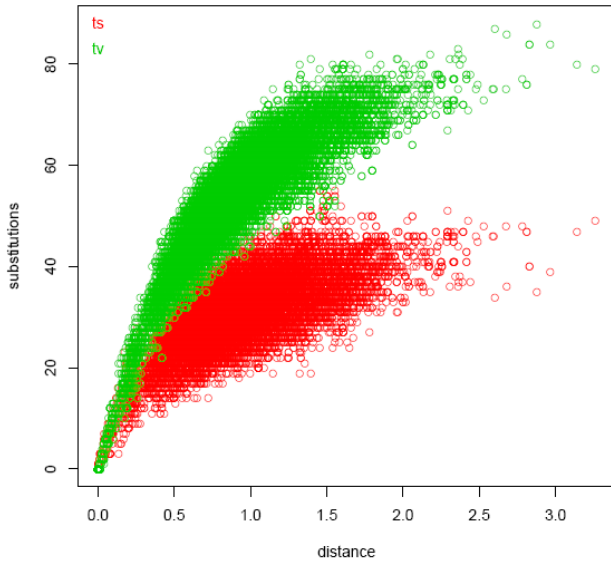**B**

1st codon position

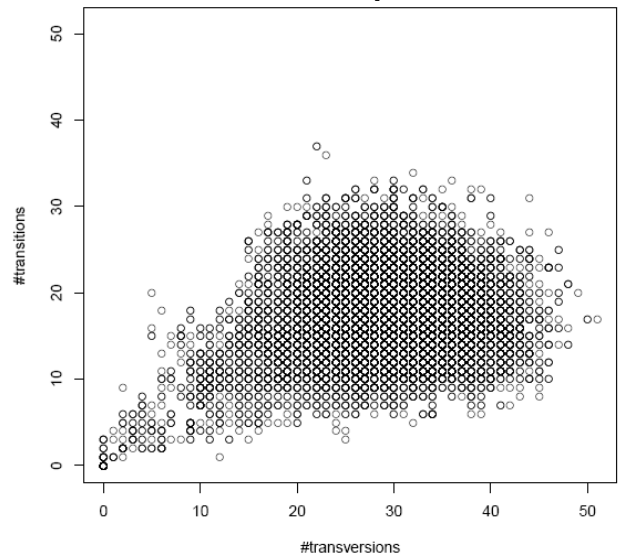**B**

2nd codon position

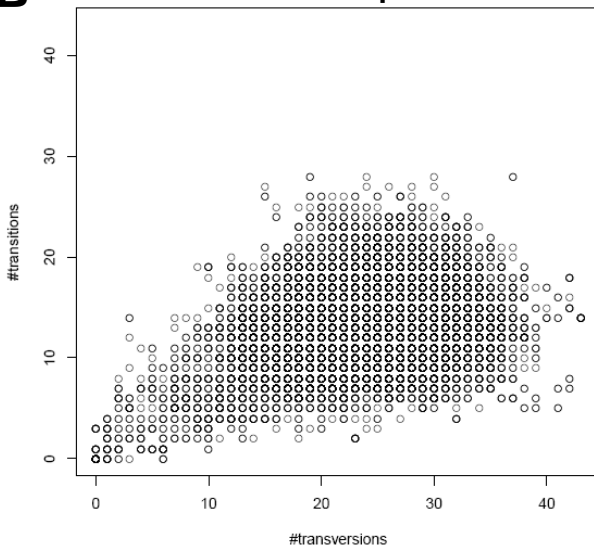

3rd codon position

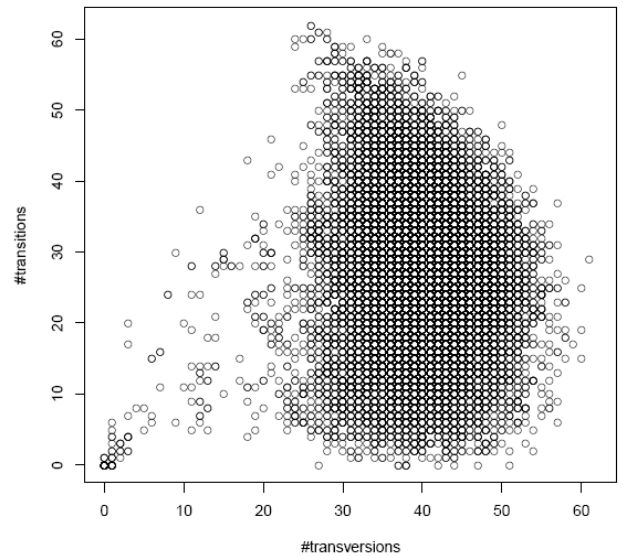

**Supplementary Figure 2: Substitution saturation analysis of the LOV nucleotide alignment. (A)** Observed numbers of transitions (ts) relative to the number of observed transversions (tv) plotted against genetic distance values for the full LOV alignment. **(B)** Observed number of transitions plotted against number of observed transversions for the 1st, 2nd and 3rd codon positions.
